# Supplementary material for: Cannabidiol in conjunction with clobazam: analysis of four randomized controlled trials
Source: PubMed Central journal article supplement — Acta Neurol Scand. 2020 Oct 22;143(2):154–63. doi: 10.1111/ane.13351 (PMC7821324; doi:10.1111/ane.13351), 2020-10-22
Supplement: ANE-143-154-s001.pdf [file ANE-143-154-s001.pdf]

## SUPPORTING INFORMATION

**TABLE S1** Demographics and baseline characteristics for LGS populations by trial, overall and on clobazam (intention-to-treat population)

|                                                                   | GWPCARE3            |                   |                   |                     |                   |                   | GWPCARE4            |                   |                     |                   |
|-------------------------------------------------------------------|---------------------|-------------------|-------------------|---------------------|-------------------|-------------------|---------------------|-------------------|---------------------|-------------------|
|                                                                   | Overall             |                   |                   | On clobazam         |                   |                   | Overall             |                   | On clobazam         |                   |
|                                                                   | Placebo<br>(n = 76) | CBD10<br>(n = 73) | CBD20<br>(n = 76) | Placebo<br>(n = 37) | CBD10<br>(n = 37) | CBD20<br>(n = 36) | Placebo<br>(n = 85) | CBD20<br>(n = 86) | Placebo<br>(n = 42) | CBD20<br>(n = 42) |
| Age, years                                                        |                     |                   |                   |                     |                   |                   |                     |                   |                     |                   |
| Mean                                                              | 15.3                | 15.4              | 16.0              | 13.0                | 14.7              | 16.1              | 15.3                | 15.5              | 12.1                | 14.4              |
| SD                                                                | 9.3                 | 9.5               | 10.8              | 7.5                 | 7.8               | 10.8              | 9.8                 | 8.7               | 7.5                 | 7.9               |
| Sex, n (%)                                                        |                     |                   |                   |                     |                   |                   |                     |                   |                     |                   |
| Male                                                              | 44 (58)             | 40 (55)           | 45 (59)           | 21 (57)             | 16 (43)           | 21 (58)           | 43 (51)             | 45 (52)           | 21 (50)             | 22 (52)           |
| Region, n (%)                                                     |                     |                   |                   |                     |                   |                   |                     |                   |                     |                   |
| USA                                                               | 62 (82)             | 60 (82)           | 59 (78)           | 33 (89)             | 36 (97)           | 31 (86)           | 66 (78)             | 62 (72)           | 38 (91)             | 39 (93)           |
| Rest of world                                                     | 14 (18)             | 13 (18)           | 17 (22)           | 4 (11)              | 1 (3)             | 5 (14)            | 19 (22)             | 24 (28)           | 4 (10)              | 3 (7)             |
| Weight at baseline, kg                                            |                     |                   |                   |                     |                   |                   |                     |                   |                     |                   |
| Mean                                                              | 45.7                | 44.3              | 41.0              | 41.7                | 42.0              | 43.6              | 43.0                | 42.7              | 39.6                | 41.6              |
| SD                                                                | 23.2                | 26.2              | 20.6              | 21.0                | 21.0              | 21.6              | 23.0                | 22.6              | 23.0                | 21.5              |
| Body mass index at baseline, kg/m <sup>2</sup>                    |                     |                   |                   |                     |                   |                   |                     |                   |                     |                   |
| Mean                                                              | 21.4                | 20.9              | 19.0              | 20.2                | 20.1              | 20.2              | 19.8                | 21.0              | 19.6                | 22.0              |
| SD                                                                | 6.9                 | 7.6               | 5.7               | 5.4                 | 5.6               | 5.4               | 5.7                 | 10.0              | 5.3                 | 12.6              |
| Baseline primary seizure frequency, per 28 days*                  |                     |                   |                   |                     |                   |                   |                     |                   |                     |                   |
| Median                                                            | 80.3                | 86.9              | 85.5              | 76.3                | 87.0              | 69.0              | 74.7                | 71.4              | 83.5                | 59.0              |
| Range                                                             | 8.7, 1278.3         | 14.0, 7494.0      | 13.0, 1092.0      | 8.7, 1278.3         | 14.0, 7494.0      | 13.5, 682.3       | 11.2, 3174.6        | 10.3, 855.9       | 22.0, 3174.6        | 10.3, 551.0       |
| Number of AEDs, median (range)                                    |                     |                   |                   |                     |                   |                   |                     |                   |                     |                   |
| Previous AEDs                                                     | 6 (1, 22)           | 6 (0, 21)         | 6 (1, 18)         | 5 (1, 16)           | 6 (1, 19)         | 5 (1, 18)         | 6 (0, 28)           | 6 (1, 18)         | 5 (0, 14)           | 5 (1, 16)         |
| Current AEDs                                                      | 3 (1, 5)            | 3 (1, 5)          | 3 (0, 5)          | 3 (1, 5)            | 3 (1, 5)          | 3 (1, 5)          | 3 (1, 4)            | 3 (1, 5)          | 3 (2, 4)            | 3 (2, 5)          |
| Most common (>25% in any group) AEDs currently being taken, n (%) |                     |                   |                   |                     |                   |                   |                     |                   |                     |                   |

|                        |         |         |         |          |          |          |         |         |          |          |
|------------------------|---------|---------|---------|----------|----------|----------|---------|---------|----------|----------|
| Clobazam               | 37 (49) | 37 (51) | 36 (47) | 37 (100) | 37 (100) | 36 (100) | 42 (49) | 42 (49) | 42 (100) | 42 (100) |
| Valproate <sup>†</sup> | 30 (40) | 27 (37) | 28 (37) | 12 (32)  | 7 (19)   | 10 (28)  | 33 (39) | 36 (42) | 12 (29)  | 12 (29)  |
| Levetiracetam          | 23 (30) | 22 (30) | 24 (32) | 14 (38)  | 9 (24)   | 12 (33)  | 35 (41) | 23 (27) | 18 (43)  | 14 (33)  |
| Lamotrigine            | 25 (33) | 22 (30) | 20 (26) | 8 (22)   | 10 (27)  | 12 (33)  | 31 (37) | 33 (38) | 14 (33)  | 17 (41)  |
| Rufinamide             | 20 (26) | 19 (26) | 26 (34) | 8 (22)   | 12 (32)  | 9 (25)   | 21 (25) | 25 (29) | 11 (26)  | 13 (31)  |

Abbreviations: AED, antiepileptic drug; CBD10, cannabidiol 10 mg/kg/day; CBD20, cannabidiol 20 mg/kg/day; LGS, Lennox-Gastaut syndrome;

SD, standard deviation.

\*Baseline period included all seizure data prior to day 1.

<sup>†</sup>Valproate includes ergenyl chrono for all trials.

**TABLE S2** Demographics and baseline characteristics for DS populations by trial, overall and on clobazam (intention-to-treat population)

|                                                                   | GWPCARE2            |                    |                   | GWPCARE1B           |                   |                   |                     |                   |                     |                   |
|-------------------------------------------------------------------|---------------------|--------------------|-------------------|---------------------|-------------------|-------------------|---------------------|-------------------|---------------------|-------------------|
|                                                                   | Overall             |                    | On clobazam       |                     |                   | Overall           |                     | On clobazam       |                     |                   |
|                                                                   | Placebo<br>(n = 65) | CBD10<br>(n = 66)* | CBD20<br>(n = 67) | Placebo<br>(n = 41) | CBD10<br>(n = 45) | CBD20<br>(n = 40) | Placebo<br>(n = 59) | CBD20<br>(n = 61) | Placebo<br>(n = 38) | CBD20<br>(n = 40) |
| Age, years                                                        |                     |                    |                   |                     |                   |                   |                     |                   |                     |                   |
| Mean                                                              | 9.6                 | 9.2                | 9.3               | 9.2                 | 9.1               | 9.6               | 9.8                 | 9.7               | 10.3                | 9.0               |
| SD                                                                | 4.6                 | 4.3                | 4.3               | 4.9                 | 4.1               | 4.0               | 4.9                 | 4.7               | 5.1                 | 4.6               |
| Sex, n (%)                                                        |                     |                    |                   |                     |                   |                   |                     |                   |                     |                   |
| Male                                                              | 31 (48)             | 27 (41)            | 36 (54)           | 19 (46)             | 23 (51)           | 23 (58)           | 27 (46)             | 35 (57)           | 16 (42)             | 22 (55)           |
| Region, n (%)                                                     |                     |                    |                   |                     |                   |                   |                     |                   |                     |                   |
| USA                                                               | 32 (49)             | 30 (46)            | 31 (46)           | 23 (56)             | 22 (49)           | 21 (53)           | 37 (63)             | 35 (57)           | 29 (76)             | 23 (58)           |
| Rest of world                                                     | 33 (51)             | 36 (55)            | 36 (54)           | 18 (44)             | 23 (51)           | 19 (48)           | 22 (37)             | 26 (43)           | 9 (24)              | 17 (43)           |
| Weight at baseline, kg                                            |                     |                    |                   |                     |                   |                   |                     |                   |                     |                   |
| Mean                                                              | 34.0                | 32.8               | 34.2              | 33.4                | 33.5              | 36.6              | 35.1                | 33.8              | 36.5                | 33.1              |
| SD                                                                | 14.9                | 16.6               | 19.2              | 16.1                | 17.3              | 21.9              | 18.3                | 16.6              | 18.9                | 17.9              |
| Body mass index at baseline, kg/m <sup>2</sup>                    |                     |                    |                   |                     |                   |                   |                     |                   |                     |                   |
| Mean                                                              | 18.8                | 18.5               | 18.9              | 18.8                | 18.9              | 19.4              | 19.1                | 18.3              | 19.3                | 18.6              |
| SD                                                                | 3.9                 | 4.5                | 4.6               | 3.4                 | 5.0               | 5.4               | 4.7                 | 4.5               | 4.3                 | 4.5               |
| Baseline primary seizure frequency, per 28 days <sup>†</sup>      |                     |                    |                   |                     |                   |                   |                     |                   |                     |                   |
| Median                                                            | 16.6                | 13.5               | 9.0               | 17.7                | 13.1              | 9.6               | 14.9                | 12.4              | 15.9                | 10.8              |
| Range                                                             | 3.0, 770.5          | 0.0, 467.0         | 3.9, 661.2        | 3.0, 401.0          | 4.0, 238.4        | 3.9, 661.2        | 3.7, 718.0          | 3.9, 1716.7       | 3.7, 448.9          | 3.9, 553.5        |
| Number of AEDs, median (range)                                    |                     |                    |                   |                     |                   |                   |                     |                   |                     |                   |
| Previous AEDs                                                     | 4 (0, 11)           | 4 (0, 19)          | 4 (0, 11)         | 4 (0, 9)            | 4 (0, 12)         | 4 (1, 11)         | 4 (0, 14)           | 4 (0, 26)         | 4 (1, 14)           | 3 (0, 20)         |
| Current AEDs                                                      | 3 (1, 5)            | 3 (1, 5)           | 3 (1, 4)          | 3 (1, 5)            | 3 (1, 5)          | 3 (2, 4)          | 3 (1, 5)            | 3 (1, 5)          | 3 (2, 5)            | 3 (1, 5)          |
| Most common (>25% in any group) AEDs currently being taken, n (%) |                     |                    |                   |                     |                   |                   |                     |                   |                     |                   |
| Clobazam                                                          | 41 (63)             | 45 (68)            | 40 (60)           | 41 (100)            | 45 (100)          | 40 (100)          | 38 (64)             | 40 (66)           | 38 (100)            | 40 (100)          |
| Valproate <sup>‡</sup>                                            | 48 (74)             | 44 (67)            | 47 (70)           | 29 (71)             | 30 (67)           | 30 (75)           | 32 (54)             | 36 (59)           | 21 (55)             | 26 (65)           |

|               |         |         |         |         |         |         |         |         |         |         |
|---------------|---------|---------|---------|---------|---------|---------|---------|---------|---------|---------|
| Stiripentol   | 24 (37) | 25 (38) | 22 (33) | 17 (41) | 17 (38) | 18 (45) | 21 (36) | 30 (49) | 14 (37) | 23 (58) |
| Levetiracetam | 14 (22) | 19 (29) | 21 (31) | 8 (20)  | 11 (24) | 9 (23)  | 17 (29) | 16 (26) | 9 (24)  | 6 (15)  |
| Topiramate    | 17 (26) | 11 (17) | 18 (27) | 11 (27) | 8 (18)  | 10 (25) | 15 (25) | 16 (26) | 7 (18)  | 8 (20)  |

Abbreviations: AED, antiepileptic drug; CBD10, cannabidiol 10 mg/kg/day; CBD20, cannabidiol 20 mg/kg/day; DS, Dravet syndrome; SD, standard deviation.

\*One patient randomized to 10 mg/kg/day CBD was not treated and was withdrawn by the principal investigator.

†Baseline period included all seizure data prior to day 1.

‡Valproate includes ergenyl chrono for all trials.

**TABLE S3** Reduction from baseline in primary seizures and  $\geq 50\%$  responder rates for by-trial LGS populations, overall and on clobazam (intention-to-treat population)

| Trial    | Treatment | LGS overall                                                  |                            |                                                                       | LGS on clobazam                                              |                            |                                                                       |
|----------|-----------|--------------------------------------------------------------|----------------------------|-----------------------------------------------------------------------|--------------------------------------------------------------|----------------------------|-----------------------------------------------------------------------|
|          |           | N                                                            | % reduction from baseline* | Difference or % reduction compared with placebo (95% CI) <sup>†</sup> | N                                                            | % reduction from baseline* | Difference or % reduction compared with placebo (95% CI) <sup>†</sup> |
| GWPCARE3 | Placebo   | 76                                                           | 17.2                       |                                                                       | 37                                                           | 22.7                       |                                                                       |
|          | CBD10     | 73                                                           | 37.2                       | 19.2 (7.7-31.2)<br><i>P</i> = .0016                                   | 37                                                           | 45.6                       | 29.6% (2.4-49.2%)<br><i>P</i> = .0355 <sup>‡</sup>                    |
|          | CBD20     | 76                                                           | 41.9                       | 21.6 (6.7-34.8)<br><i>P</i> = .0047                                   | 36                                                           | 64.3                       | 53.8% (35.7-66.8%)<br><i>P</i> < .0001 <sup>‡</sup>                   |
| GWPCARE4 | Placebo   | 85                                                           | 21.8                       |                                                                       | 42                                                           | 30.7                       |                                                                       |
|          | CBD20     | 86                                                           | 43.9                       | 17.2 (4.1-30.3)<br><i>P</i> = .0135                                   | 42                                                           | 62.4                       | 45.7% (27.0-59.6%)<br><i>P</i> < .0001 <sup>‡</sup>                   |
|          |           | <b><math>\geq 50\%</math> responder rate (%)<sup>§</sup></b> |                            |                                                                       | <b><math>\geq 50\%</math> responder rate (%)<sup>§</sup></b> |                            |                                                                       |
| GWPCARE3 | Placebo   | 76                                                           | 14.5                       |                                                                       | 37                                                           | 21.6                       |                                                                       |
|          | CBD10     | 73                                                           | 35.6                       | <i>P</i> = .0030                                                      | 37                                                           | 40.5                       | <i>P</i> = .0584 <sup>‡</sup>                                         |
|          | CBD20     | 76                                                           | 39.5                       | <i>P</i> = .0006                                                      | 36                                                           | 55.6                       | <i>P</i> = .0021 <sup>‡</sup>                                         |
| GWPCARE4 | Placebo   | 85                                                           | 23.5                       |                                                                       | 42                                                           | 28.6                       |                                                                       |
|          | CBD20     | 86                                                           | 44.2                       | <i>P</i> = .0043                                                      | 42                                                           | 54.8                       | <i>P</i> = .0140 <sup>‡</sup>                                         |

Abbreviations: CBD10, cannabidiol 10 mg/kg/day; CBD20, cannabidiol 20 mg/kg/day; CI, confidence interval; LGS, Lennox-Gastaut syndrome.

\*Data for the overall population are presented as median percent reduction from baseline; data for the on-clobazam subgroup are presented as percent reduction from baseline estimated from a negative binomial regression analysis.

†Overall data are presented as estimated median difference and *P*-value from a Wilcoxon rank-sum test. Data for the on-clobazam subgroup are estimated from a negative binomial regression analysis.

‡Nominal *P*-value.

§The overall *P*-value is based on a Cochran-Mantel-Haenszel test; the nominal *P*-values for the on-clobazam subgroup are based on logistic regression analysis.

**TABLE S4** Other secondary endpoints for by-trial LGS populations, overall and on clobazam (intention-to-treat population)

|                                                                           |         | Overall population |       |         | Patients on clobazam |       |         |
|---------------------------------------------------------------------------|---------|--------------------|-------|---------|----------------------|-------|---------|
|                                                                           |         | N                  | Value | P-value | N                    | Value | P-value |
| Percentage reduction in total seizures per 28 days over treatment period* |         |                    |       |         |                      |       |         |
| GWPCARE3                                                                  | Placebo | 76                 | 19    |         | 37                   | 25    |         |
|                                                                           | CBD10   | 73                 | 36    | .0015   | 37                   | 53    | .0025†  |
|                                                                           | CBD20   | 76                 | 38    | .0091   | 36                   | 64    | <.0001† |
| GWPCARE4                                                                  | Placebo | 85                 | 14    |         | 42                   | 25    |         |
|                                                                           | CBD20   | 86                 | 41    | .0005   | 42                   | 66    | <.0001† |
| Improvement in S/CGIC, % of patients*                                     |         |                    |       |         |                      |       |         |
| GWPCARE3                                                                  | Placebo | 75                 | 44    |         | 37                   | 46    |         |
|                                                                           | CBD10   | 73                 | 66    | .0020†  | 37                   | 76    | .0005†  |
|                                                                           | CBD20   | 75                 | 57    | .0439†  | 35                   | 80    | .0003†  |
| GWPCARE4                                                                  | Placebo | 85                 | 34    |         | 42                   | 31    |         |
|                                                                           | CBD20   | 84                 | 58    | .0012†  | 41                   | 81    | <.0001† |
| ≥75% responder rate, %                                                    |         |                    |       |         |                      |       |         |
| GWPCARE3                                                                  | Placebo | 76                 | 3     |         | 37                   | 3     |         |
|                                                                           | CBD10   | 73                 | 11    | .0603†  | 37                   | 11    | .1836†  |
|                                                                           | CBD20   | 76                 | 25    | .0010†  | 36                   | 36    | .0044†  |
| GWPCARE4                                                                  | Placebo | 85                 | 8     |         | 42                   | 7     |         |
|                                                                           | CBD20   | 86                 | 20    | .0297†  | 42                   | 31    | .0051†  |
| Drop seizure-free days per 28 days, change from baseline                  |         |                    |       |         |                      |       |         |
| GWPCARE3                                                                  | Placebo | 76                 | 2.3   |         | 37                   | 3.4   |         |
|                                                                           | CBD10   | 73                 | 5.6   | .0030†  | 37                   | 6.7   | .0259†  |

|          |         |    |     |                     |    |      |                     |
|----------|---------|----|-----|---------------------|----|------|---------------------|
|          | CBD20   | 76 | 6.9 | <.0001 <sup>†</sup> | 36 | 11.0 | <.0001 <sup>†</sup> |
| GWPCARE4 | Placebo | 85 | 3.4 |                     | 42 | 3.4  |                     |
|          | CBD20   | 86 | 6.1 | .0075 <sup>†</sup>  | 42 | 8.9  | <.0001 <sup>†</sup> |

*Note:* For median percentage reduction in total seizures per 28 days over treatment period, overall data are analyzed using a Wilcoxon rank-sum test. On-clobazam *P*-values are percentage reduction from baseline estimated from a negative binomial regression analysis. The S/CGIC and  $\geq 75\%$  responder rate data were analyzed using a logistic regression model with treatment, factor, and factor by treatment interaction as covariates. The change from baseline in seizure-free days is analyzed using an ANCOVA model with baseline number of drop seizure-free days, age group, treatment, factor, and factor by treatment interaction as covariates. All statistical analyses are based on difference or percentage reduction compared with placebo.

Abbreviations: ANCOVA, analysis of covariance; CBD10, cannabidiol 10 mg/kg/day; CBD 20, cannabidiol 20 mg/kg/day; LGS, Lennox-Gastaut syndrome; S/CGIC, Subject/Caregiver Global Impression of Change.

\*Key secondary endpoint.

<sup>†</sup>Nominal *P*-value.



**TABLE S5** Percentage reduction from baseline in primary seizures and ≥50% responder rates for DS by trial

| Trial    | Treatment | DS overall                                 |                            |                                                                       | DS on clobazam |                            |                                                                       |
|----------|-----------|--------------------------------------------|----------------------------|-----------------------------------------------------------------------|----------------|----------------------------|-----------------------------------------------------------------------|
|          |           | N                                          | % reduction from baseline* | Difference or % reduction compared with placebo (95% CI) <sup>†</sup> | N              | % reduction from baseline* | Difference or % reduction compared with placebo (95% CI) <sup>†</sup> |
| GWPCARE2 | Placebo   | 65                                         | 26.9                       |                                                                       | 41             | 37.6                       |                                                                       |
|          | CBD10     | 66                                         | 48.7                       | 29.8% (8.4-46.2%)<br><i>P</i> = .0095                                 | 45             | 60.9                       | 37.4% (13.9-54.5%)<br><i>P</i> = .0042 <sup>‡</sup>                   |
|          | CBD20     | 67                                         | 45.7                       | 25.7% (2.9-43.2%)<br><i>P</i> = .0299                                 | 40             | 56.8                       | 30.8% (3.6-50.4%)<br><i>P</i> = .0297 <sup>‡</sup>                    |
| GWPCARE1 | Placebo   | 59                                         | 13.3                       |                                                                       | 38             | 18.9                       |                                                                       |
|          | CBD20     | 61                                         | 38.9                       | 22.8 (5.4-41.1)<br><i>P</i> = .0123                                   | 40             | 53.6                       | 42.8% (17.4-60.4%)<br><i>P</i> = .0032 <sup>‡</sup>                   |
|          |           | <b>≥50% responder rate (%)<sup>§</sup></b> |                            |                                                                       | <b>N</b>       |                            |                                                                       |
| GWPCARE2 | Placebo   | 65                                         | 26.2                       |                                                                       | 41             | 36.6                       |                                                                       |
|          | CBD10     | 66                                         | 43.9                       | <i>P</i> = .0332                                                      | 45             | 55.6                       | <i>P</i> = .0623 <sup>‡</sup>                                         |
|          | CBD20     | 67                                         | 49.3                       | <i>P</i> = .0069                                                      | 40             | 62.5                       | <i>P</i> = .0130 <sup>‡</sup>                                         |
| GWPCARE1 | Placebo   | 59                                         | 27.1                       |                                                                       | 38             | 23.7                       |                                                                       |
|          | CBD20     | 61                                         | 42.6                       | <i>P</i> = .0784                                                      | 40             | 47.5                       | <i>P</i> = .0382 <sup>‡</sup>                                         |

Abbreviations: CBD10, cannabidiol 10 mg/kg/day; CBD20, cannabidiol 20 mg/kg/day; CI, confidence interval; DS, Dravet syndrome.

\*For trial GWPCARE1, overall data are presented as median percent reduction from baseline. Data for trial GWPCARE2 and the on-clobazam subgroup are presented as percent reduction from baseline estimated from a negative binomial regression analysis.

<sup>†</sup>For trial GWPCARE1, overall data are presented as estimated median difference and *P*-value from a Wilcoxon rank-sum test. Data for trial GWPCARE2 and the on-clobazam subgroup are estimated from a negative binomial regression analysis.

<sup>‡</sup>Nominal *P*-value.

<sup>§</sup>The overall *P*-value is based on a Cochran-Mantel-Haenszel test; the nominal *P*-value for the on-clobazam subgroup is based on logistic regression analysis.

**TABLE S6** Other secondary endpoints for DS populations by trial, overall and on clobazam (intention-to-treat population)

|                                                                                  |         | Overall population |       |                    | Patients on clobazam |       |                    |
|----------------------------------------------------------------------------------|---------|--------------------|-------|--------------------|----------------------|-------|--------------------|
|                                                                                  |         | N                  | Value | P-value            | N                    | Value | P-value            |
| Median percentage reduction in total seizures per 28 days over treatment period* |         |                    |       |                    |                      |       |                    |
| GWPCARE2                                                                         | Placebo | 65                 | 30    |                    | 41                   | 41    |                    |
|                                                                                  | CBD10   | 66                 | 56    | .0003 <sup>†</sup> | 45                   | 66    | .0003 <sup>†</sup> |
|                                                                                  | CBD20   | 67                 | 47    | .0255 <sup>†</sup> | 40                   | 58    | .0341 <sup>†</sup> |
| GWPCARE1                                                                         | Placebo | 59                 | 9     |                    | 38                   | 27    |                    |
|                                                                                  | CBD20   | 61                 | 29    | .0335 <sup>†</sup> | 40                   | 54    | .0211 <sup>†</sup> |
| Improvement in S/CGIC, % of patients*                                            |         |                    |       |                    |                      |       |                    |
| GWPCARE2                                                                         | Placebo | 65                 | 42    |                    | 41                   | 42    |                    |
|                                                                                  | CBD10   | 66                 | 68    | .0009 <sup>†</sup> | 45                   | 73    | .0009 <sup>†</sup> |
|                                                                                  | CBD20   | 66                 | 61    | .0279 <sup>†</sup> | 39                   | 77    | .0018 <sup>†</sup> |
| GWPCARE1                                                                         | Placebo | 58                 | 35    |                    | 37                   | 30    |                    |
|                                                                                  | CBD20   | 60                 | 62    | .0155 <sup>†</sup> | 39                   | 62    | .0136 <sup>†</sup> |
| ≥75% responder rate, %                                                           |         |                    |       |                    |                      |       |                    |
| GWPCARE2                                                                         | Placebo | 65                 | 6     |                    | 41                   | 10    |                    |
|                                                                                  | CBD10   | 66                 | 30    | .0012 <sup>†</sup> | 45                   | 36    | .0075 <sup>†</sup> |
|                                                                                  | CBD20   | 67                 | 18    | .0507 <sup>†</sup> | 40                   | 25    | .0731 <sup>†</sup> |
| GWPCARE1                                                                         | Placebo | 59                 | 12    |                    | 38                   | 13    |                    |
|                                                                                  | CBD20   | 61                 | 23    | .1131 <sup>†</sup> | 40                   | 25    | .2311 <sup>†</sup> |
| Convulsive seizure-free days per 28 days, change from baseline                   |         |                    |       |                    |                      |       |                    |
| GWPCARE2                                                                         | Placebo | 65                 | 1.6   |                    | 41                   | 2.6   |                    |
|                                                                                  | CBD10   | 66                 | 4.0   | .0009 <sup>†</sup> | 45                   | 5.3   | .0015 <sup>†</sup> |
|                                                                                  | CBD20   | 67                 | 2.9   | .0683 <sup>†</sup> | 40                   | 3.9   | .1348 <sup>†</sup> |
| GWPCARE1                                                                         | Placebo | 59                 | 1.7   |                    | 38                   | 1.2   |                    |

---

|       |    |     |                    |    |     |                    |
|-------|----|-----|--------------------|----|-----|--------------------|
| CBD20 | 61 | 3.1 | .0396 <sup>†</sup> | 40 | 3.4 | .0114 <sup>†</sup> |
|-------|----|-----|--------------------|----|-----|--------------------|

---

*Note:* For median percentage reduction in total seizures per 28 days over treatment period, overall data are analyzed using a Wilcoxon rank-sum test. On-clobazam *P*-values are percentage reduction from baseline estimated from a negative binomial regression analysis. The S/CGIC and  $\geq 75\%$  responder rate was analyzed using a logistic regression model with treatment, factor, and factor by treatment interaction as covariates. The change from baseline in seizure-free days is analyzed using an ANCOVA model with baseline number of convulsive seizure-free days, age group, treatment, factor, and factor by treatment interaction as covariates. All statistical analyses are based on difference or percentage reduction compared with placebo.

Abbreviations: ANCOVA, analysis of covariance; CBD10, cannabidiol 10 mg/kg/day; CBD20, cannabidiol 20 mg/kg/day; DS, Dravet syndrome; S/CGIC, Subject/Caregiver Global Impression of Change.

\*Key secondary endpoint.

<sup>†</sup>Nominal *P*-value.
